# Supplementary material for: Not spreading in reverse: The dewetting of a liquid film into a single drop
Source: PubMed Central journal article supplement (PMC5040479; doi:10.1126/sciadv.1600183), 2016-09-28
Supplement: 1600183_SM.pdf [file 1600183_SM.pdf]

## Supplementary Materials for

### **Not spreading in reverse: The dewetting of a liquid film into a single drop**

Andrew M. J. Edwards, Rodrigo Ledesma-Aguilar, Michael I. Newton, Carl V. Brown, Glen McHale

Published 28 September 2016, *Sci. Adv.* **2**, e1600183 (2016)

DOI: 10.1126/sciadv.1600183

#### **The PDF file includes:**

- Legends for movies S1 and S2

#### **Other Supplementary Material for this manuscript includes the following:**

(available at [advances.sciencemag.org/cgi/content/full/2/9/e1600183/DC1](http://advances.sciencemag.org/cgi/content/full/2/9/e1600183/DC1))

- movie S1 (.avi format). Top view of a 1.45- $\mu$ l thin liquid film dewetting from a Teflon-covered dielectrowetting 5-cm-wide circular patch at room temperature.
- movie S2 (.avi format). Side view of a 1.45- $\mu$ l thin liquid film dewetting from a Teflon-covered dielectrowetting 5-cm-wide circular patch at room temperature.

## **Supplementary Materials**

movie S1. Top view of a 1.45- $\mu$ l thin liquid film dewetting from a Teflon-covered dielectrowetting 5-cm-wide circular patch at room temperature.

movie S2. Side view of a 1.45- $\mu$ l thin liquid film dewetting from a Teflon-covered dielectrowetting 5-cm-wide circular patch at room temperature.
